# Supplementary material for: Development and Large-Scale Validation of A Highly Accurate SARS-COV-2 Serological Test Using Regular Test Strips for Autonomous and Affordable Finger-Prick Sample Collection, Transportation, and Storage
Source: Research Square preprint supplement (doi:10.21203/rs.3.rs-668316/v1), 2021-07-14
Supplement: Supplementary file 1 [file d88478be9fdd6ea883746ca4.pdf]

# **Development and large-scale validation of a highly accurate SARS-COV-2 serological test using regular test strips for autonomous and affordable finger-prick sample collection, transportation, and storage: Supplementary material**

Renata G. F. Alvim<sup>1#</sup>, Tulio M. Lima<sup>1,2#</sup>, Danielle A. S. Rodrigues<sup>3,4#</sup>, Federico F. Marsili<sup>1,5</sup>, Vicente B. T. Bozza<sup>3</sup>, Luiza M. Higa<sup>6</sup>, Fabio L. Monteiro<sup>6</sup>, Daniel P. B. Abreu<sup>1</sup>, Isabela C. Leitão<sup>3</sup>, Renato S. Carvalho<sup>7</sup>, Rafael M. Galliez<sup>8</sup>, Terezinha M. P. P. Castineiras<sup>8</sup>, Leonardo H. Travassos<sup>3</sup>, Alberto Nobrega<sup>4</sup>, Amilcar Tanuri<sup>6</sup>, Orlando C. Ferreira Jr.<sup>6</sup>, Leda R. Castilho<sup>1,5\*</sup>, André M. Vale<sup>3\*</sup>,

Federal University of Rio de Janeiro - UFRJ, Brazil: (1) COPPE, Chemical Engineering Program, Cell Culture Engineering Lab.; (2) School of Chemistry, EPQB Program; (3) Institute of Biophysics Carlos Chagas Filho, Program in Immunobiology; (4) Institute of Microbiology, Immunology Dept.; (5) Institute of Chemistry, Biochemistry Program; (6) Biology Institute, Genetics Dept., Molecular Virology Lab.; (7) School of Pharmacy, Pharmaceutical Biotechnology Dept.; (8) Medical School, Infectious and Parasitic Disease Dept.

<sup>#</sup>these authors have contributed equally

<sup>\*</sup>joint senior authors

**Corresponding authors:** André M. Vale (valeam@biof.ufrj.br) and Leda R. Castilho (leda@peq.coppe.ufrj.br)

**Keywords:** SARS-COV-2; spike protein ELISA; serological test; dried blood spots; COVID-19 surveillance.

**Supplementary Figure S1:** Receiver operating characteristic (ROC) curve of S-UFRJ test. The curve is based on calculating the sensitivity and specificity as a function of varying cut-off values (each data point represents one cut-off value). Sensitivity and specificity were determined based on a panel comprising 420 positive and 68 negative samples.

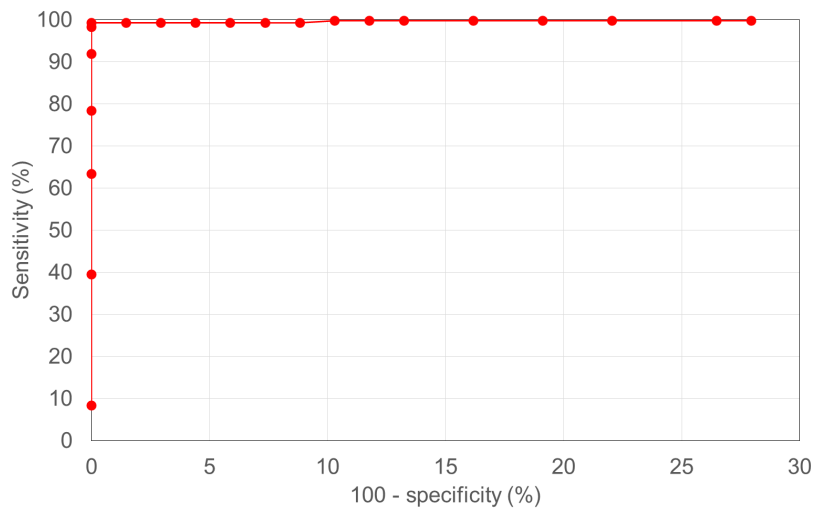

**Supplementary Table S1:** Cost estimate of consumables needed for S-UFRJ test, considering two scenarios: (1) purchase of materials sold by international suppliers in the country and with no saving efforts; (2) purchase of materials from domestic suppliers and making saving efforts that were validated as not interfering in test performance (data not shown): use of skim milk (2% m/v) instead of BSA (1% m/v); in-house preparation of PBS; finger prick using just the sterile lancet, with no lancing device; and reuse of buffer reservoirs for an equivalent of 30 ELISA plates. As a conservative estimate to account for controls included in each plate and for any eventual repetition needs or failures, a total of 80 tests were considered per each ELISA plate. All quotes for consumables in this table were obtained in June-July 2020 for purchase in the local market in Brazilian reais (BRL). The conversion to USD was done considering an exchange rate of 1 USD = 5.34 BRL (as of July 16, 2020).

| Consumables                                 | Supplier                     | Amount used (per 80 samples or per plate) | Unit cost (converted to USD) | Package size                  | Cost per plate (USD) |
|---------------------------------------------|------------------------------|-------------------------------------------|------------------------------|-------------------------------|----------------------|
| <b>Scenario 1 (international suppliers)</b> |                              |                                           |                              |                               |                      |
| Dilution plate                              | Sarstedt, #821581 (Germany)  | 1                                         | 63.67                        | per 100                       | 0.64                 |
| ELISA plate                                 | Corning, #3590 (USA)         | 1                                         | 146.07                       | per 100                       | 1.46                 |
| S protein                                   | Produced at UFRJ             | 20 µg                                     | 140.45                       | per mg                        | 2.81                 |
| PBS 10x                                     | Sigma, #11666789001-4L (USA) | 350 mL after 1:10 dilution                | 166.67                       | per 4000 mL                   | 1.46                 |
| BSA (at 1% m/v)                             | Sigma, #A2153-100G (USA)     | 0.35 g BSA                                | 344.57                       | per 100 g                     | 1.21                 |
| HRP-conjugated antibody                     | Sigma, #SAB3701282-2MG (USA) | 5 mL after 1:8000 dilution                | 261.61                       | per mL @ 2 mg/mL              | 0.16                 |
| TMB                                         | Thermo Fisher, #002023 (USA) | 5 mL                                      | 186.30                       | per 500 mL                    | 1.86                 |
| HCl 37%                                     | Sigma, #30721-2.5L (USA)     | 5 mL after 1:10 dilution                  | 32.58                        | per 2500 mL                   | 0.01                 |
| Pipette tips                                | Axygen (USA)                 | 400 yellow tips                           | 176.03                       | per 20000                     | 3.52                 |
| Reagent reservoir                           | Corning Costar (USA)         | 6 reservoirs for 30 plates                | 146.07                       | per 1000                      | 0.88                 |
| Plastic strips w/ 3 pads                    | Organicoat (Brazil)          | 80                                        | 243.45                       | per 5000                      | 3.90                 |
| Lancet                                      | G-Tech (Brazil)              | 80                                        | 1.22                         | per 100                       | 0.97                 |
| Lancing device                              | G-Tech (Brazil)              | 1                                         | 2.79                         | per 1                         | 2.79                 |
| Personal protective equipment (PPE)         | Several suppliers            | All PPEs (sample collection/analysis)     | 2.50                         | set of PPEs                   | 2.50                 |
| Additional minor non-listed consumables     |                              | 20% of all previous items together        | 4.83                         |                               | 4.83                 |
|                                             |                              |                                           |                              | <b>Total costs per plate:</b> | <b>28.99</b>         |
|                                             |                              |                                           |                              | <b>Cost per test:</b>         | <b>0.36</b>          |

|                                                                                                       |                          |                                       |        |                              |              |
|-------------------------------------------------------------------------------------------------------|--------------------------|---------------------------------------|--------|------------------------------|--------------|
| <b>Scenario 2 (domestic suppliers, skim milk, in-house PBS, reservoir reuse, no lanceting device)</b> |                          |                                       |        |                              |              |
| Dilution plate                                                                                        | Alfa (Brazil)            | 1                                     | 28.09  | per 50                       | 0.56         |
| ELISA plate                                                                                           | Corning, #3590 (USA)     | 1                                     | 146.07 | per 100                      | 1.46         |
| S protein                                                                                             | Produced in-house        | 20 µg                                 | 140.45 | per mg                       | 2.81         |
| PBS (1x) (in-house prep)                                                                              | Synth Chemicals (Brazil) | 350 mL                                | 0.09   | per liter                    | 0.03         |
| Skim milk (at 2% m/v)                                                                                 | Nestlé (Switzerland)     | 0.7 g milk                            | 3.04   | per 280 g                    | 0.01         |
| HRP-conjugated polyclonal antibody                                                                    | Rhea Biotech (Brazil)    | 5 mL after 1:20000 dilution           | 196.63 | per mL                       | 0.05         |
| TMB                                                                                                   | Scienco Biotech (Brazil) | 5 mL                                  | 209.74 | per 1000 mL                  | 1.05         |
| HCl 37%                                                                                               | Sigma, #30721-2.5L (USA) | 5 mL after 1:10 dilution              | 32.58  | per 2500 mL                  | 0.01         |
| Pipette tips                                                                                          | Olen-Econolab (Brazil)   | 400 yellow tips                       | 3.75   | per 1000                     | 1.50         |
| Reagent reservoir                                                                                     | Corning Costar (USA)     | 6 reservoirs for 30 plates            | 146.07 | per 1000                     | 0.03         |
| Plastic strips w/ 3 pads                                                                              | Organicoat (Brazil)      | 80 per plate                          | 243.45 | per 5000                     | 3.90         |
| Lancet                                                                                                | G-Tech (Brazil)          | 80 per plate                          | 1.22   | per 100                      | 0.97         |
| Personal protective equipment (PPE)                                                                   | Several suppliers        | All PPEs (sample collection/analysis) | 2.50   | set of PPEs                  | 2.50         |
| Additional minor non-listed consumables                                                               |                          | 20% of all previous items together    | 2.97   |                              | 2.97         |
|                                                                                                       |                          |                                       |        | <b>Total cost per plate:</b> | <b>17.85</b> |
|                                                                                                       |                          |                                       |        | <b>Cost per test:</b>        | <b>0.22</b>  |

**Supplementary Table S2:** Estimate of the final S-UFRJ test price taking 1 million tests as a calculation basis, including in the cost computation the raw materials shown in Table S1, other manufacturing costs (that include labor, utilities, laboratory charges, insurance, among others) and general expenses (which account for administrative, research, development, distribution and marketing costs)<sup>7</sup>. Profit margin and taxes were also accounted for to estimate the final S-UFRJ test price, since large-scale use of the test for epidemiological surveillance would probably require its industrial production.

| Type of cost                                                       | Calculation         | Scenario 1 (USD) | Scenario 2 (USD) |
|--------------------------------------------------------------------|---------------------|------------------|------------------|
| <i>Raw materials (RM) for 1 million tests</i>                      | <i>See Table S1</i> | 220000           | 360000           |
| <i>Other manufacturing costs for 1 million tests</i>               | <i>145% of RM</i>   | 319000           | 522000           |
| <i>General expenses for 1 million tests</i>                        | <i>20% of TPC</i>   | 134750           | 220500           |
| Total product costs (TPC) for 1 million tests                      |                     | 673750           | 1102500          |
| Profit margin (PR) (10% of TPC)                                    |                     | 67375            | 110250           |
| Taxes (35% of PR)                                                  |                     | 23581            | 38588            |
| Sum of TPC, PR and taxes                                           |                     | 764706           | 1251338          |
| Estimated unit price per test                                      |                     | 0.76             | 1.25             |
| <b>Final estimated price per test (average of the 2 scenarios)</b> |                     | <b>1.01</b>      |                  |
